# Supplementary material for: Oxidative potential of coarse particulate matter (PM10–2.5) and its relation to water solubility and sources of trace elements and metals in the Los Angeles Basin
Source: Royal Society of Chemistry journal article supplement (doi:10.1039/c5em00364d), 2015-01-01

## **Supplementary Information**

### **Oxidative potential of coarse particulate matter (PM<sub>10-2.5</sub>) and its relation to water solubility and sources of trace elements and metals in the Los Angeles Basin**

Farimah Shirmohammadi<sup>1</sup>, Sina Hasheminassab<sup>1</sup>, Dongbin Wang<sup>1</sup>, Arian Saffari<sup>1</sup>, James J. Schauer<sup>2</sup>, Martin M. Shafer<sup>2</sup>,  
Ralph J. Delfino<sup>3</sup>, Constantinos Sioutas<sup>1\*</sup>

<sup>1</sup> University of Southern California, Department of Civil and Environmental Engineering, Los Angeles, CA, USA

<sup>2</sup> University of Wisconsin-Madison, Environmental Chemistry and Technology Program, Madison, WI, USA

<sup>3</sup> University of California, Irvine, Department of Epidemiology, School of Medicine, Irvine, CA, USA

\*Corresponding author: [sioutas@usc.edu](mailto:sioutas@usc.edu)

Table S1. Water solubility fraction of selected metals ( $\pm$  standard deviation) at Central LA and Anaheim.

| Species | Central LA       | Anaheim           |
|---------|------------------|-------------------|
| Na      | $0.74 \pm 0.17$  | $0.27 \pm 0.10$   |
| Ca      | $0.68 \pm 0.14$  | $0.25 \pm 0.03$   |
| S       | $0.83 \pm 0.16$  | $0.32 \pm 0.05$   |
| Mg      | $0.52 \pm 0.18$  | $0.20 \pm 0.05$   |
| Ba      | $0.50 \pm 0.08$  | $0.15 \pm 0.03$   |
| Cu      | $0.37 \pm 0.16$  | $0.13 \pm 0.05$   |
| Zn      | $0.46 \pm 0.22$  | $0.22 \pm 0.05$   |
| Fe      | $0.01 \pm 0.01$  | $0.003 \pm 0.002$ |
| Al      | $0.01 \pm 0.01$  | $0.002 \pm 0.002$ |
| Mn      | $0.29 \pm 0.09$  | $0.11 \pm 0.02$   |
| Sb      | $0.01 \pm 0.01$  | $0.09 \pm 0.03$   |
| Mo      | $0.19 \pm 0.05$  | $0.08 \pm 0.01$   |
| Ni      | $0.08 \pm 0.08$  | $0.18 \pm 0.3$    |
| V       | $0.07 \pm 0.04$  | $0.03 \pm 0.02$   |
| Ti      | $0.00 \pm 0.00$  | $0.00 \pm 0.00$   |
| Co      | $0.22 \pm 0.09$  | $0.25 \pm 0.03$   |
| Rb      | $0.09 \pm 0.03$  | $0.03 \pm 0.01$   |
| As      | $0.20 \pm 0.10$  | $0.01 \pm 0.05$   |
| Cr      | $0.02 \pm 0.02$  | $0.01 \pm 0.005$  |
| Cd      | $0.49 \pm 0.20$  | $0.19 \pm 0.05$   |
| Y       | $0.01 \pm 0.01$  | $0.01 \pm 0.01$   |
| La      | $0.01 \pm 0.004$ | $0.004 \pm 0.002$ |
| Nd      | $0.01 \pm 0.01$  | $0.005 \pm 0.004$ |
| Pr      | $0.01 \pm 0.01$  | $0.004 \pm 0.003$ |
| Rh      | $0.06 \pm 0.02$  | $0.03 \pm 0.02$   |
| Pb      | 0                | $0.01 \pm 0.01$   |

Figure S1 (a-b). Geometric mean concentrations (ng/μg PM) of water-soluble and water-insoluble metals in coarse particles at a) Central LA and b) Anaheim. Error bars are standard deviation. Pb was below detection limit in water-soluble fraction.

a)

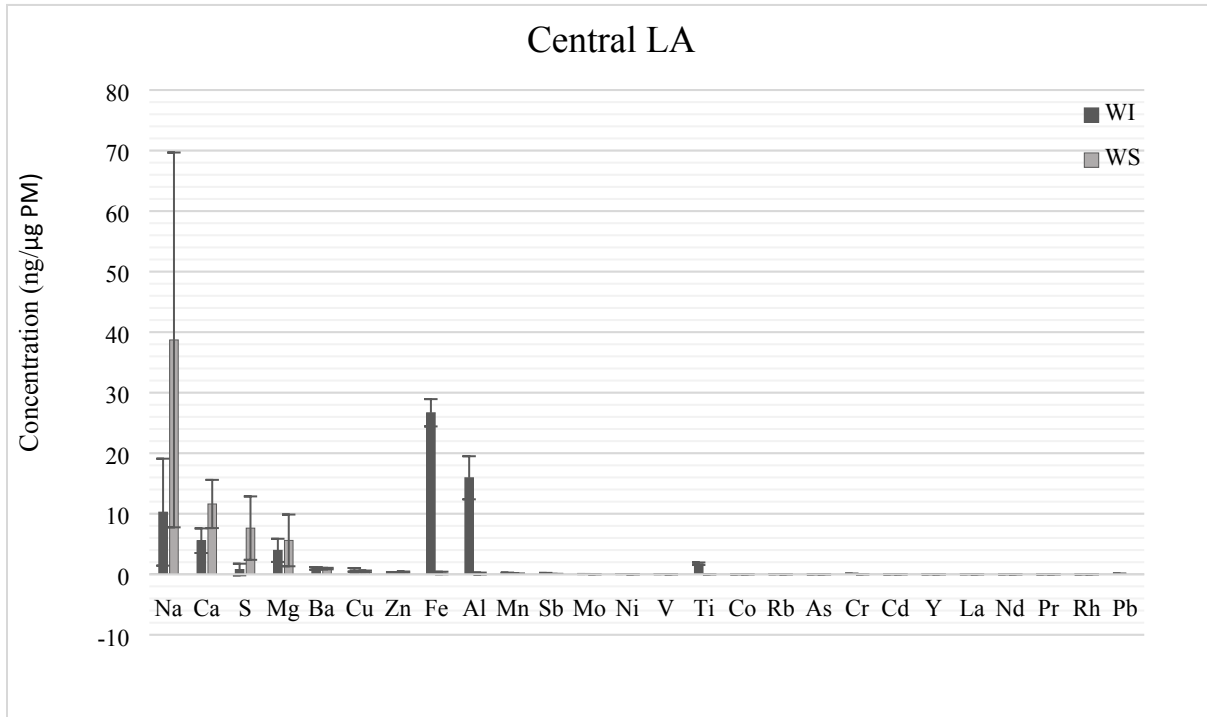

b)

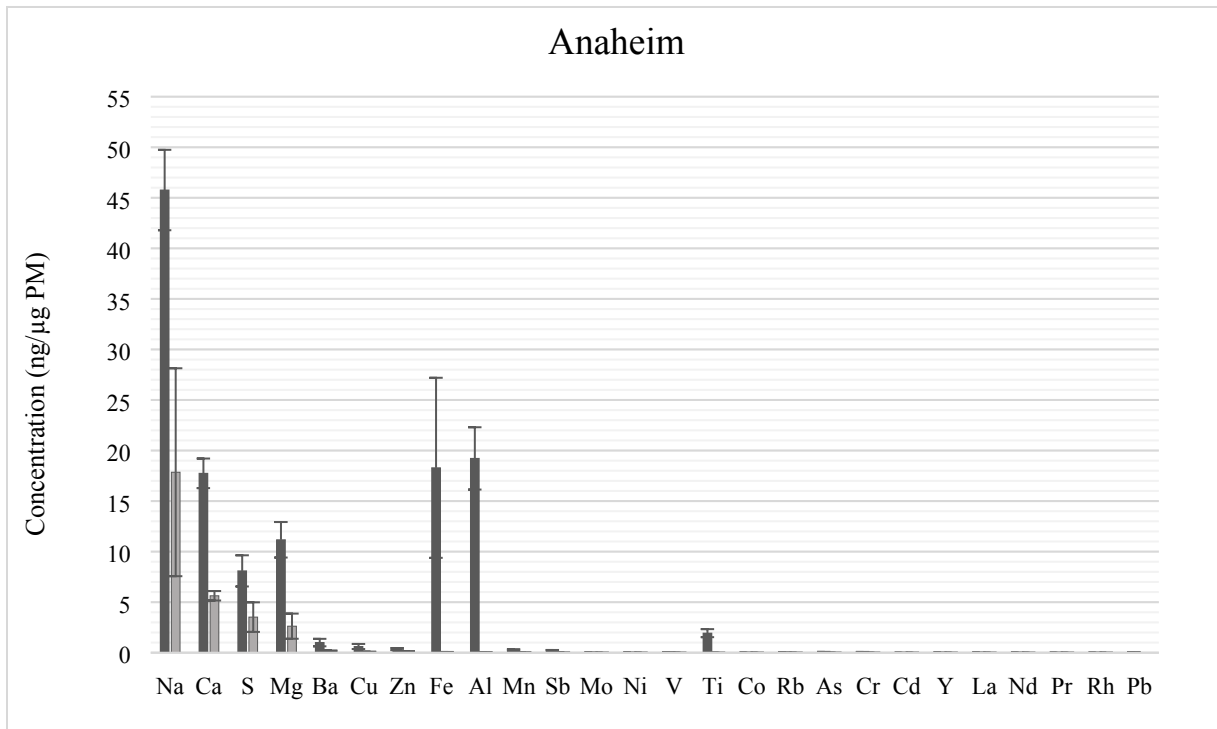

Figure S2. Box plots of mass-based ROS activity comparison between Cheung et al. (2012) study and current study at Central. Dotted lines represent arithmetic means. The black dots correspond to the 5<sup>th</sup> and 95<sup>th</sup> percentiles

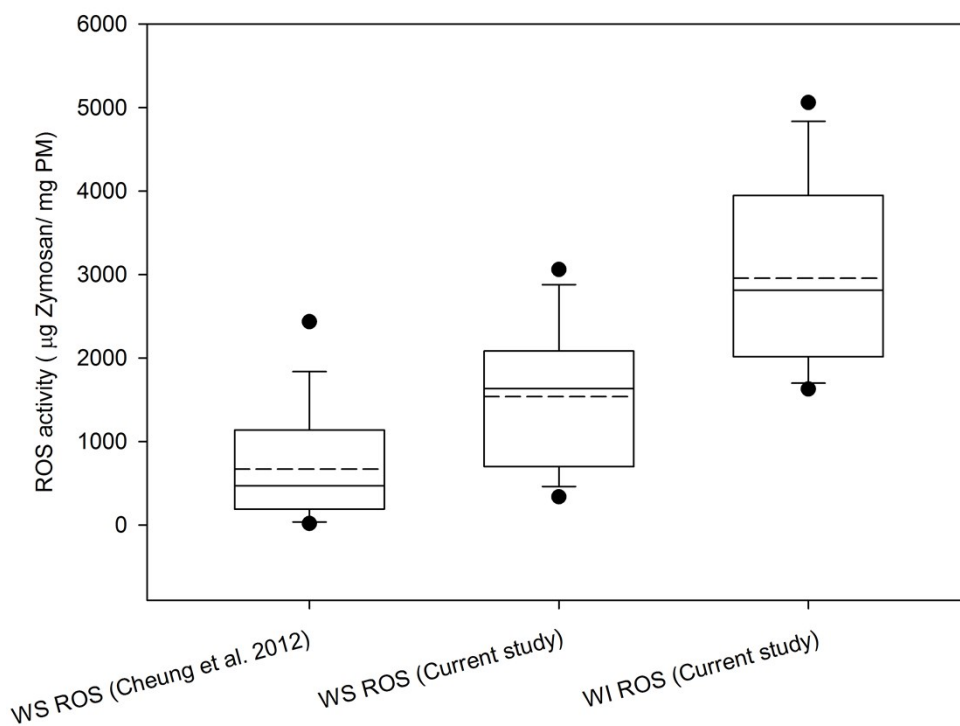

Figure S3. Box plots of sum of selected metals contribution to vehicular abrasion, road dust and other trace elements from Cheung et al., (2012) study and current study at Central LA. Dotted lines represent arithmetic means. The black dots correspond to the 5<sup>th</sup> and 95<sup>th</sup> percentiles.

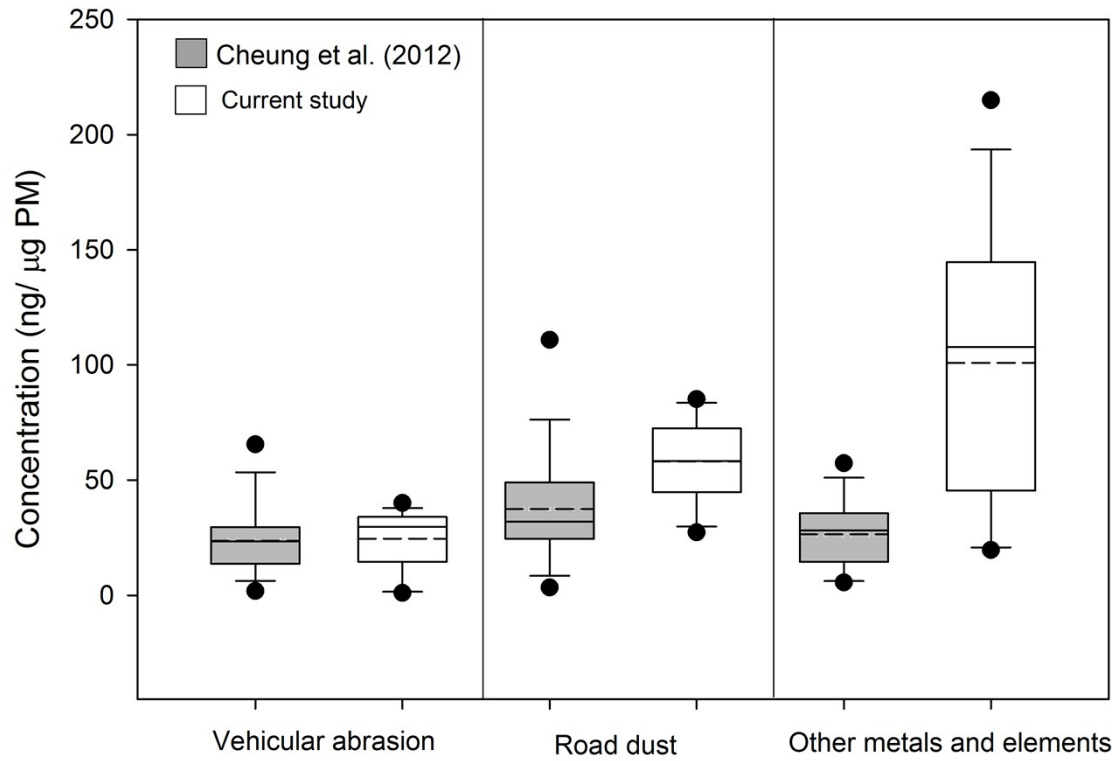

Figure S4 (a-b). Box plots of daily-averaged a) traffic flow (vehicles/day) and b) speed (mph) by year cluster in Central LA. Dotted lines represent arithmetic means. The black dots correspond to the 5<sup>th</sup> and 95<sup>th</sup> percentiles. Traffic data retrieved from the nearest vehicle detection station to the sampling site in Central LA on I-110 (southbound). \*  $P < 0.001$ , statistical significant difference compared with 2009-2010 dataset, by Mann-Whitney rank sum test.

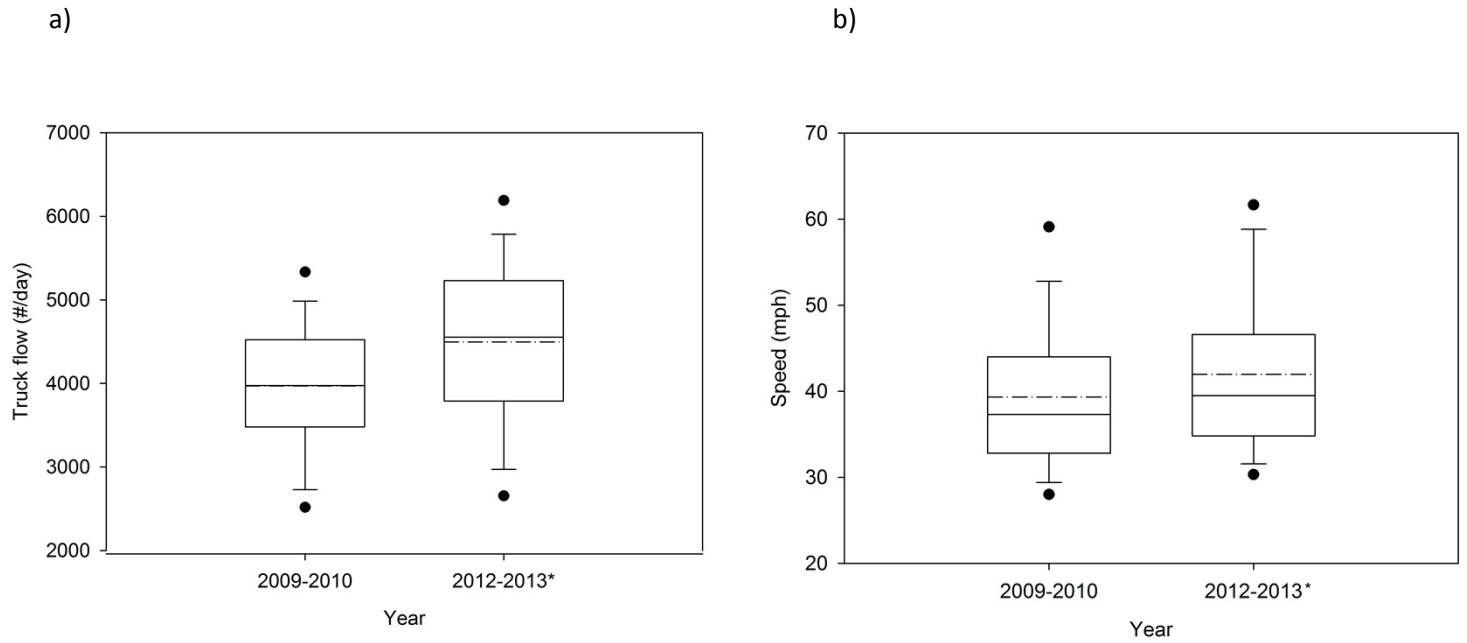

Supplement: c5em00364d1.pdf [file c5em00364d1.pdf]
